# Supplementary material for: Heterogeneous double-activation catalysis: Rh complex and tertiary amine on the same solid surface for the 1,4-addition reaction of aryl- and alkylboronic acids
Source: Royal Society of Chemistry journal article supplement (doi:10.1039/c5cy00133a), 2015-01-01
Supplement: c5cy00133a1.pdf [file c5cy00133a1.pdf]

*Supporting Information*

Heterogeneous Double-Activation Catalysis: Rh Complex and Tertiary Amine on Same  
Solid Surface for the 1,4-Addition Reaction of Aryl- and Alkylboronic Acids

Hiroto Noda, Ken Motokura, Wang-Jae Chun, Akimitsu Miyaji, Sho Yamaguchi,  
Toshihide Baba

*Department of Environmental Chemistry and Engineering, Tokyo Institute of  
Technology, 4259 Nagatsuta-cho, Midori-ku, Yokohama, 226-8502, Japan*

Contents

|                                                                                 |     |
|---------------------------------------------------------------------------------|-----|
| NMR measurement                                                                 | S2  |
| XAFS data acquisition                                                           | S3  |
| Materials                                                                       | S3  |
| Preparation of catalysts                                                        | S4  |
| Catalytic reaction procedures                                                   | S6  |
| Solid-state $^{29}\text{Si}$ MAS NMR spectra                                    | S7  |
| XPS analysis                                                                    | S8  |
| XANES analysis                                                                  | S9  |
| EXAFS analysis                                                                  | S10 |
| Result of curve-fitting analysis of EXAFS                                       | S11 |
| Effect of additional free amine on 1,4-addition reaction                        | S12 |
| Hot filtration                                                                  | S13 |
| Kinetic study                                                                   | S14 |
| $^{13}\text{C}$ CP/MAS NMR of $\text{SiO}_2/\text{diamine}/\text{Rh}/\text{Me}$ | S16 |
| $^1\text{H}$ NMR and $^{13}\text{C}$ NMR spectra of products                    | S17 |
| References                                                                      | S19 |

## Experimental Section

### NMR measurements

$^1\text{H}$  and  $^{13}\text{C}$  NMR spectra were recorded in  $\text{CDCl}_3$  with an AVANCE 400 spectrometer (Bruker) operating at 400 and 100.6 MHz, respectively. Solid-state  $^{13}\text{C}$  and  $^{29}\text{Si}$  MAS NMR spectra (MAS rate = 5 kHz) were recorded with an AVANCE III spectrometer (Bruker) operating at 100.6 and 79.5 MHz, respectively. The cross-polarization (CP) contact time in the  $^{13}\text{C}$  CP/MAS NMR measurements was 1.0 ms. The accumulation number and delay time were about 20000 and 20 s ( $^{13}\text{C}$ ), and 10000 and 15 s ( $^{29}\text{Si}$ ), respectively. Adamantane ( $\delta$  38.52 and 29.47 ppm) and hexamethylcyclotrisiloxane ( $\delta$  -9.66 ppm) were used as external standards for the calibration of chemical shifts.

Both  $^{11}\text{B}$  MAS NMR spectroscopy and MQ MAS experiments were performed using a Bruker Avance III spectrometer (9.4 T) operating at 128.3 MHz for boron using a 4.0 mm MAS probe. MAS was performed at a rotation speed of 14 kHz.  $\pi/3$  pulses with an rf field strength of 111 kHz was used. Chemical shifts were referenced relative to an aqueous solution of  $\text{B(OH)}_3$ . The relaxation delays were 10 s. The  $^{11}\text{B}$  2D3Q MAS NMR spectra were recorded by three-pulse z-filtering with rotor synchronization at a spinning rate of 12 kHz. The excitation pulse was a  $\pi$  pulse, and the conversion pulse was a  $\pi/3$  pulse. The conversion delay was 10 s. For each  $t_1$  increment, 1000 scans were used to accumulate signals. Fourier transform with respect to  $t_1$  and  $t_2$  led to pure adsorption 2D spectra. The spectra were sheared, so that the orthogonal projection of the 2D spectrum on the isotropic axis gave a high-resolution 1D spectrum free of any anisotropic broadening.

## XAFS data acquisition

XAFS was measured in transmission mode at the BL7 of the Kyusyu Synchrotron Light Research Center (Proposal number: 1404015F, SAGA-LS, Saga, Japan). The electron storage ring was operated at 1.4 GeV-137 mA. Synchrotron radiation from the storage ring was monochromatized with a Si (220) channel-cut crystals. Ionization chambers filled with Ar gas and Kr were used as detectors monitoring incident X-rays ( $I_0$ ) and transmitted one ( $I$ ), respectively. The angle of the monochromator was calibrated by using Rh foil, the inflection point of which at the edge was set at 23220 eV.

XAFS spectra were analyzed by using Athena and Artemis.<sup>[1]</sup> The backscattering amplitude and phase shift of Rh-C, Rh-O, Rh-Rh were calculated using FEFF8.4 code<sup>[2]</sup> with the crystallographic data of a bulk Rh and  $[\text{Rh}(\text{COD})\text{OH}]_2$  complex.

A goodness of curve fit was estimated using the following equation.

$$R_{factor} = \sqrt{\frac{k^n \chi_{exp}(k) - k^n \chi_{cf}(k)}{k^n \chi_{experimental}(k)}}$$

where  $\chi_{exp}(k), \chi_{cf}(k)$  are the experimental data, curve-fitted data (theoretical) , respectively.

## Materials

Aerosil® 300 (NIPPON AEROSIL Co.) was used as the  $\text{SiO}_2$ .  $\text{SiO}_2$  was treated at 120 °C under vacuum before use. Unless otherwise noted, all other materials were purchased from Wako Pure Chemicals, Tokyo Kasei Co., Kanto Kagaku Co., and Aldrich Inc. and were used without further purification. 1,3,5-Triisopropylbenzene was used as an internal standard in catalytic reactions.

## Preparation of Catalyst

### Preparation of SiO<sub>2</sub>/diamine/NEt<sub>2</sub> and SiO<sub>2</sub>/diamine/Rh/NEt<sub>2</sub>

The SiO<sub>2</sub> (Aerosil<sup>®</sup> 300, 300 m<sup>2</sup>g<sup>-1</sup>, SiO<sub>2</sub> content: >99.9%) was pretreated at 120 °C for 3 h under vacuum. Dried SiO<sub>2</sub> (0.64 g) was placed in a round-bottom flask and treated with 15.0 mL of a toluene solution containing 3-(2-Aminoethylamino)propyltrimethoxysilane (0.40 mmol,  $9.0 \times 10^{-2}$  g) and 3-diethylaminopropyltrimethoxysilane (0.40 mmol,  $9.5 \times 10^{-2}$  g) at 40 °C for 1 h. Toluene was removed by vacuum evaporation, affording SiO<sub>2</sub>/diamine/NEt<sub>2</sub>. Then, 0.21 g of SiO<sub>2</sub>/diamine/NEt<sub>2</sub> was treated with 3.0 mL of dioxane containing [Rh(cod)OH]<sub>2</sub> ( $5.0 \times 10^{-2}$  mmol, Rh: 0.10 mmol) at 90 °C for 4 h. The resulting mixture was evaporated and dry under vacuum, affording SiO<sub>2</sub>/diamine/Rh/NEt<sub>2</sub>-a. For the detailed reaction conditions used in the preparation of the other SiO<sub>2</sub>-supported Rh catalysts, see Table S1.

**Table S1.** Detailed conditions for preparation of catalysts

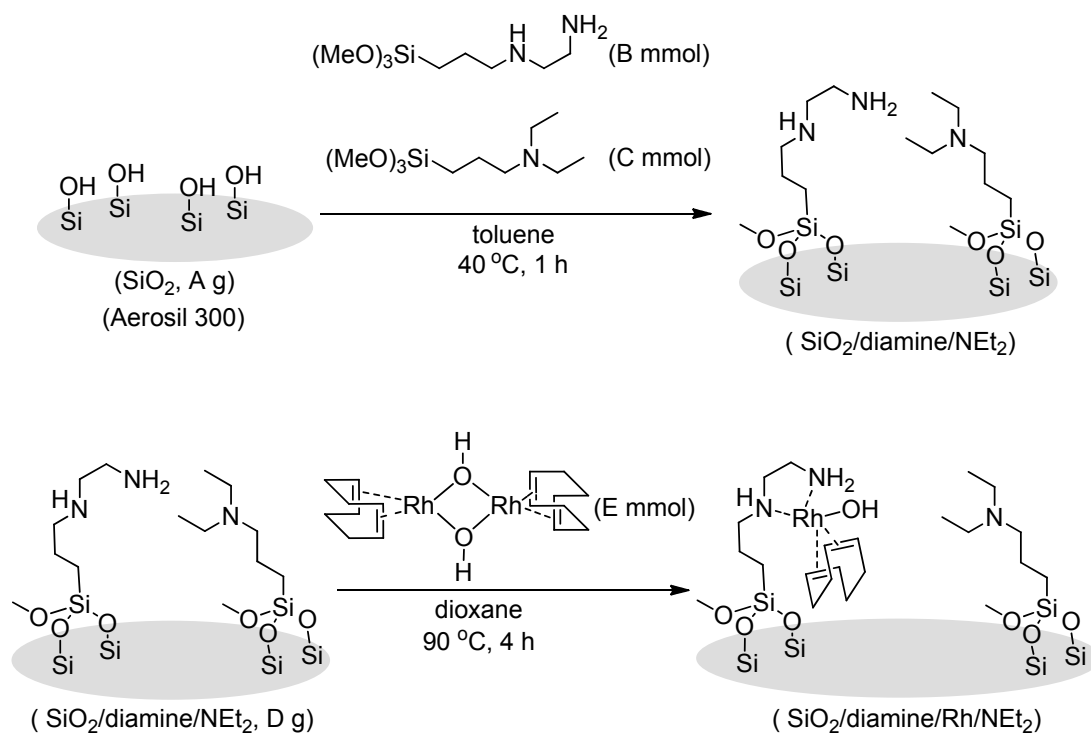

| Catalyst                                                      | A: $\text{SiO}_2$<br>(g) | B:<br>Diamine<br>(mmol) | C:<br>Tertiary<br>amine<br>(mmol) | D:<br>$\text{SiO}_2/\text{diamine}$<br>$/\text{NEt}_2$ (g) | E:<br>$[\text{Rh}(\text{cod})\text{OH}]_2$<br>(mmol) |
|---------------------------------------------------------------|--------------------------|-------------------------|-----------------------------------|------------------------------------------------------------|------------------------------------------------------|
| $\text{SiO}_2/\text{diamine}/\text{Rh-a}$                     | 0.64                     | 0.40                    | -                                 | 0.18                                                       | 0.050                                                |
| $\text{SiO}_2/\text{diamine}/\text{Rh-b}$                     | 0.89                     | 0.070                   | -                                 | 0.60                                                       | 0.025                                                |
| $\text{SiO}_2/\text{diamine}/\text{Rh}/\text{NEt}_2\text{-a}$ | 0.64                     | 0.40                    | 0.40                              | 0.21                                                       | 0.050                                                |
| $\text{SiO}_2/\text{diamine}/\text{Rh}/\text{NEt}_2\text{-b}$ | 0.64                     | 0.050                   | 0.050                             | 0.41                                                       | 0.013                                                |
| $\text{SiO}_2/\text{diamine}/\text{Rh}/\text{NEt}_2\text{-c}$ | 1.30                     | 0.10                    | 0.70                              | 0.60                                                       | 0.021                                                |
| $\text{SiO}_2/\text{diamine}/\text{Rh}/\text{NEt}_2\text{-d}$ | 1.30                     | 0.10                    | 1.50                              | 1.40                                                       | 0.045                                                |
| $\text{SiO}_2/\text{diamine}/\text{Rh}/\text{NEt}_2\text{-e}$ | 0.64                     | 0.30                    | 0.30                              | 0.21                                                       | 0.038                                                |
| $\text{SiO}_2/\text{diamine}/\text{Rh}/\text{NEt}_2\text{-f}$ | 0.64                     | 0.20                    | 0.20                              | 0.21                                                       | 0.025                                                |
| $\text{SiO}_2/\text{diamine}/\text{Rh}/\text{NEt}_2\text{-g}$ | 0.64                     | 0.10                    | 0.10                              | 0.41                                                       | 0.025                                                |

## **Catalytic Reaction Procedures**

### **1,4-Addition reaction using silica-supported Rh catalyst**

The silica-supported Rh catalyst (6.0  $\mu\text{mol}$ ), dioxane/ $\text{H}_2\text{O}$  (10/1, 2.0 mL), cyclohexenone (**1**) (1.0 mmol) and phenylboronic acid (**2**) (1.5 mmol) were placed in a Pyrex glass reactor. The resulting mixture was stirred vigorously for 1 h at 60 °C under Ar. The product was confirmed by GC-MS and NMR. Yields and conversion were determined by  $^1\text{H}$  NMR using a  $\text{CDCl}_3$  solution of the reaction mixture.

### **Treatment of $\text{SiO}_2/\text{NEt}_2$ with phenylboronic acid for NMR analysis of the reaction intermediate**

$\text{SiO}_2/\text{NEt}_2$  (0.10 g, N: 0.083 mmol), dioxane/ $\text{H}_2\text{O}$  (10/1, 1.0 mL), and phenylboronic acid (**2**) (0.083 mmol) were placed in a Pyrex glass reactor. The resulting mixture was vigorously stirred for 5 min at 40 °C under Ar. Then, the solvent was evaporated under vacuum, and the resulting solid was transferred to NMR sample rotor.

### **Treatment of $\text{SiO}_2/\text{diamine}/\text{Rh}/\text{NEt}_2$ with phenylboronic acid for $^{11}\text{B}$ NMR analysis of the reaction intermediate**

$\text{SiO}_2/\text{diamine}/\text{Rh}/\text{NEt}_2$  (0.19 g, tertiary amine: 0.085 mmol), dioxane/ $\text{H}_2\text{O}$  (10/1, 1.0 mL), and phenylboronic acid (**2**) (0.085 mmol) were placed in a Pyrex glass reactor. The resulting mixture was vigorously stirred for 5 min at 40 °C under Ar. Then, the solvent was evaporated under vacuum, and the resulting solid was transferred to NMR sample rotor.

## Solid-State $^{29}\text{Si}$ MAS NMR Spectra

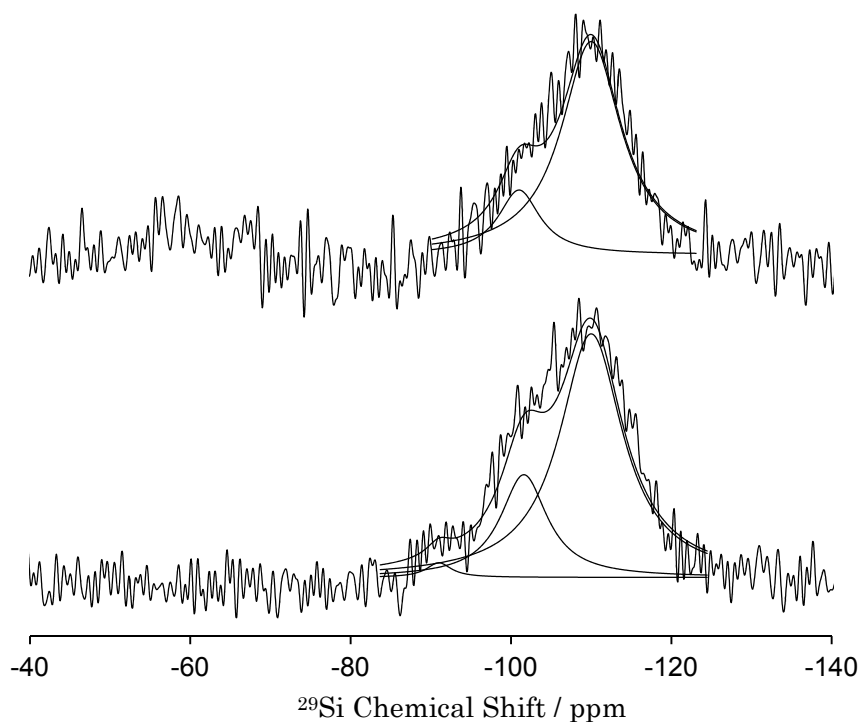

**Figure S1.** Solid-state  $^{29}\text{Si}$  MAS NMR spectra of (A)  $\text{SiO}_2$  and (B)  $\text{SiO}_2/\text{diamine}/\text{Rh}/\text{NEt}_2\text{-a}$ .

$$Q^3/(Q^2 + Q^3 + Q^4): 0.23 \rightarrow 0.17$$

$$Q^2/(Q^2 + Q^3 + Q^4): 0.02 \rightarrow <0.01$$

The total silanol content in the parent  $\text{SiO}_2$  (4.2 mmol/g) was calculated from the  $Q^3/Q_{\text{total}}$  and  $Q^2/Q_{\text{total}}$  values and the molecular weight of  $\text{SiO}_2$ . This value was close to the amount of silanol calculated on the basis of the weight loss of the  $\text{SiO}_2$  via thermogravimetric (TG) analysis (4.6 mmol/g). The amount of silanol decrease (1.5 mmol/g) was calculated from the silanol content of the parent  $\text{SiO}_2$  determined by  $^{29}\text{Si}$  NMR and the  $Q^3/Q_{\text{total}}$  and  $Q^2/Q_{\text{total}}$  values after the silane-coupling reaction.

## XPS Analysis

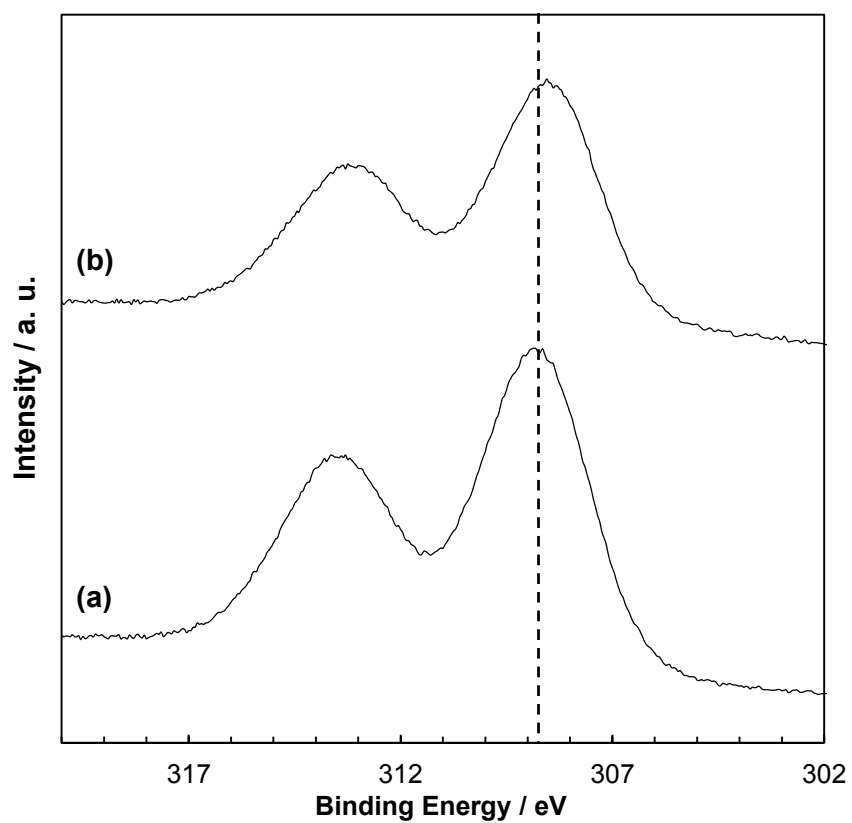

**Figure S2.** XPS spectra for Rh 3d<sub>5/2</sub> from (a) SiO<sub>2</sub>/diamine/Rh/NEt<sub>2</sub>-a and (b) SiO<sub>2</sub>/diamine/Rh-a.



## XANES Analysis

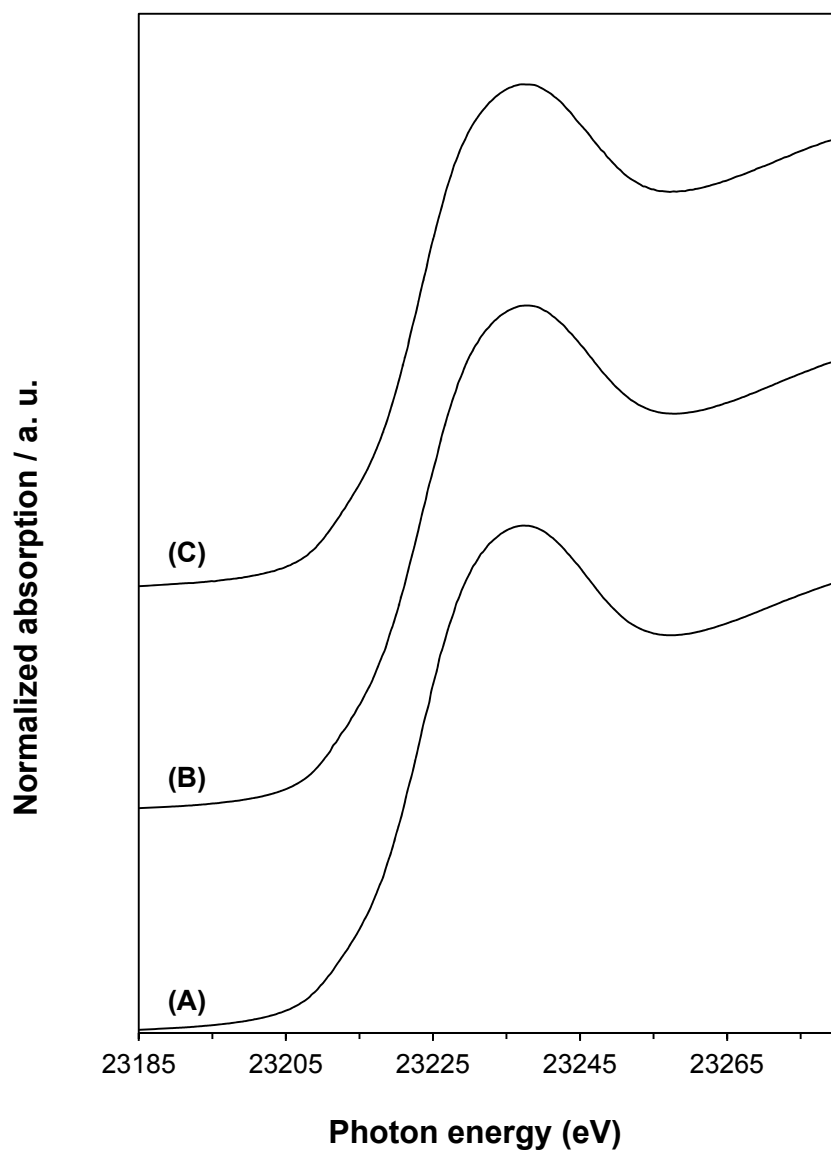

**Figure S3.** Rh K-edge XANES spectra of (A)  $\text{SiO}_2/\text{diamine}/\text{Rh}/\text{NEt}_2\text{-a}$ , (B)  $\text{SiO}_2/\text{diamine}/\text{Rh}/\text{NEt}_2\text{-b}$ , and (C)  $\text{SiO}_2/\text{diamine}/\text{Rh}/\text{NEt}_2\text{-f}$ .

## EXAFS Analysis

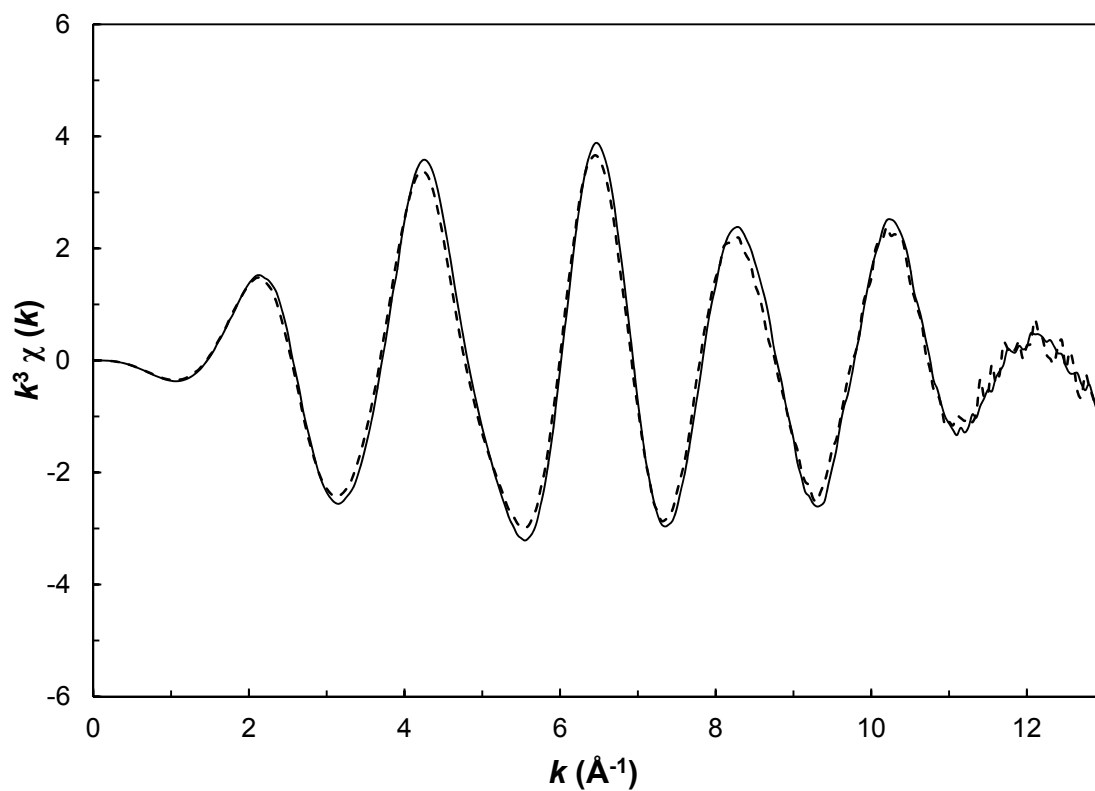

**Figure S4.** EXAFS spectra of (a)  $\text{SiO}_2/\text{diamine}/\text{Rh}/\text{NEt}_2\text{-a}$  (solid line) and (b) recovered  $\text{SiO}_2/\text{diamine}/\text{Rh}/\text{NEt}_2\text{-a}$  after the 1,4-addition between **1** and **2** (dashed line).

## Results of Curve-Fitting Analysis of EXAFS

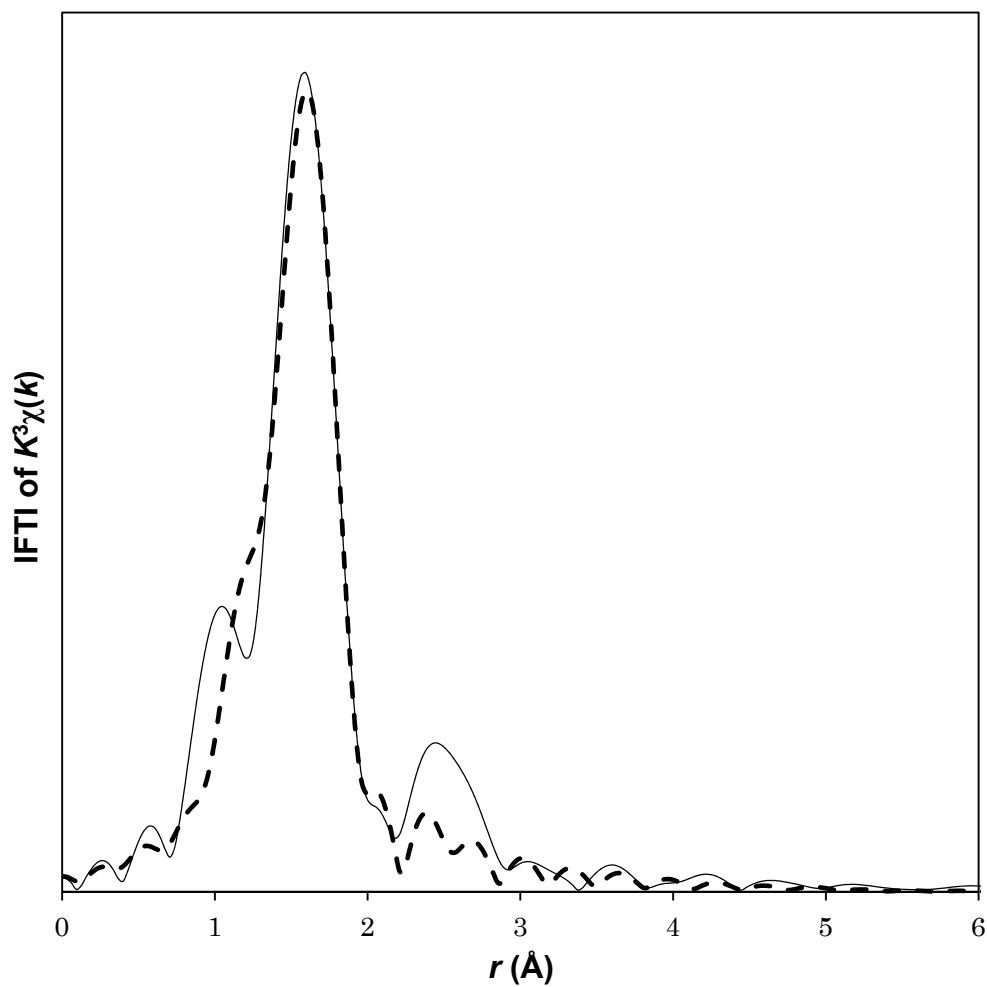

**Figure S5.** FT of  $k^3$ -weighted Rh K-edge EXAFS spectra for  $\text{SiO}_2/\text{diamine}/\text{Rh}/\text{NEt}_2\text{-a}$  (solid line), and fitted spectra for  $\text{SiO}_2/\text{diamine}/\text{Rh}/\text{NEt}_2\text{-a}$  (dashed line). (FT: 3–13  $\text{\AA}$ , FF: 1.2–2.0  $\text{\AA}$ )

### Effect of Additional Free Amine on 1,4-addition Reaction

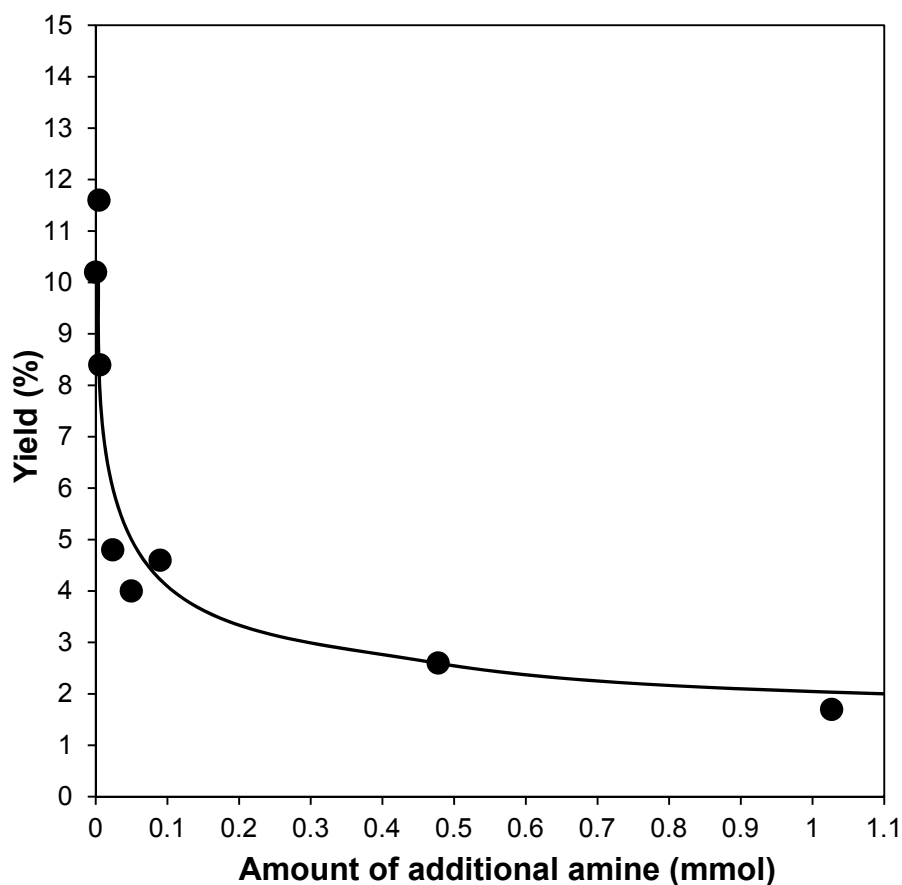

**Figure S6.** Effect of additional free amine with the SiO<sub>2</sub>/diamine/Rh-a catalyst on the product yield of the 1,4-addition of phenylboronic acid to cyclohexenone. Reaction conditions: cyclohexenone (**1**) (1.0 mmol), phenylboronic acid (**2**) (1.5 mmol), SiO<sub>2</sub>/diamine/Rh (Rh: 6.0  $\mu$ mol), 1,4-dioxane/H<sub>2</sub>O (10/1, 2.0 mL), 60 °C, 1h, free tertiary amine (diethylbutylamine: 0–1.027 mmol).

## Hot Filtration

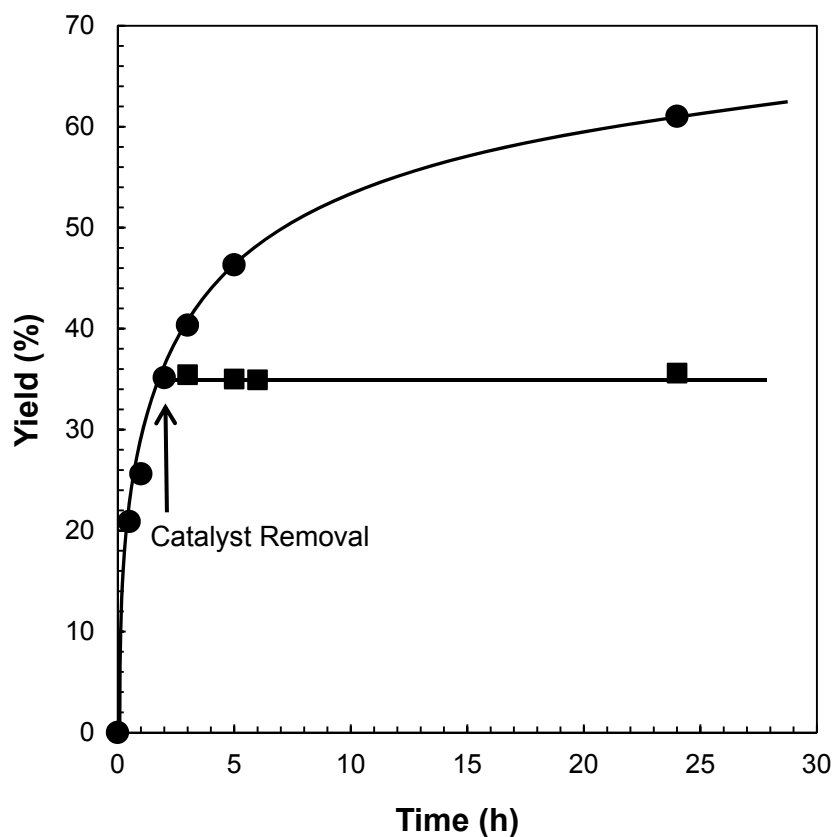

**Figure S7.** Effect of removal of  $\text{SiO}_2/\text{diamine}/\text{Rh}/\text{NEt}_2$  (Rh: 0.388mmol/g, tertiary amine: 1.19 mmol/g) catalyst on product yield of 1,4-addition between **1** and **2**. Without removal of  $\text{SiO}_2/\text{diamine}/\text{Rh}/\text{NEt}_2\text{-a}$  (●); an arrow indicates the removal of  $\text{SiO}_2/\text{diamine}/\text{Rh}/\text{NEt}_2\text{-a}$  (■). Reaction conditions: phenylboronic acid (**1**) (1.0 mmol), cyclohexenone (**2**) (1.5 mmol),  $\text{SiO}_2/\text{diamine}/\text{Rh}/\text{NEt}_2\text{-a}$  (Rh: 6.0  $\mu\text{mol}$ ), 1,4-dioxane/ $\text{H}_2\text{O}$  (10/1, 2.0 mL), 60 °C.

## Kinetic Study

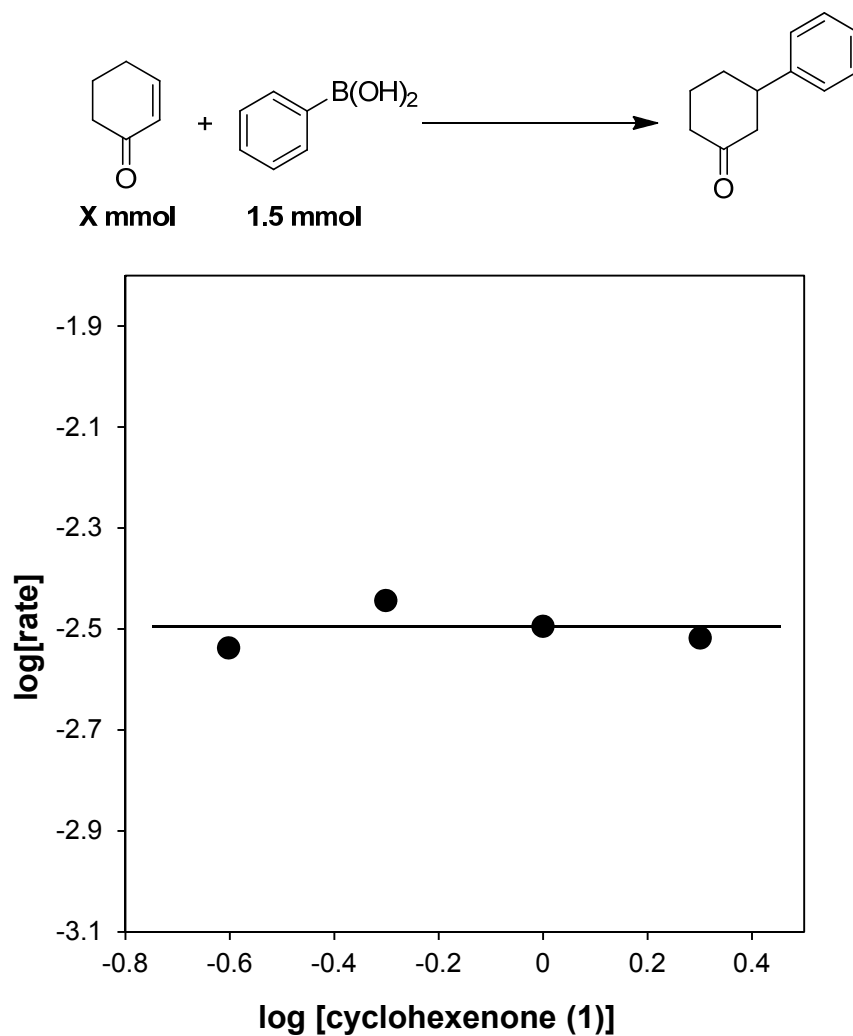

**Figure S8.** Plot of log[rate] vs. log[cyclohexenone] for the reaction of **1** with **2**. Reaction conditions: cyclohexenone (**1**), phenylboronic acid (**2**) (1.5 mmol), SiO<sub>2</sub>/diamine/Rh-a (Rh: 6.0 μmol), 1,4-dioxane/H<sub>2</sub>O (10/1, 2.0 mL), 60 °C.

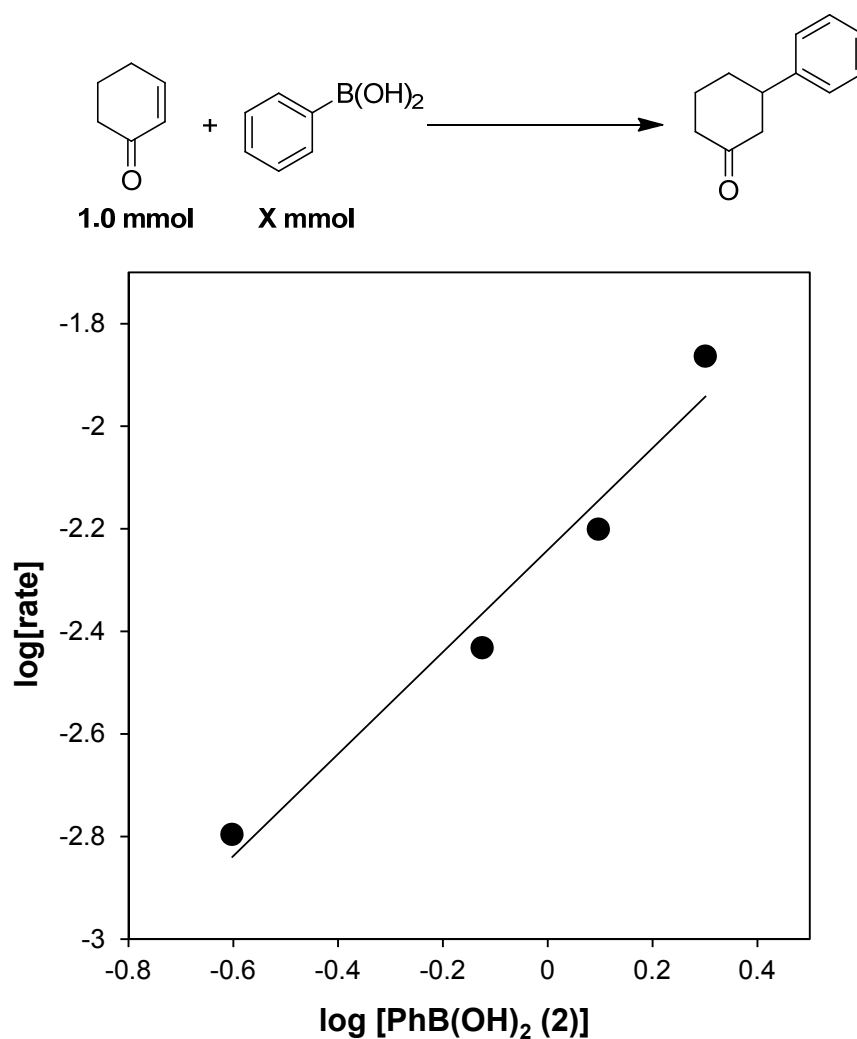

**Figure S9.** Plot of log[rate] vs. log[PhB(OH)<sub>2</sub>] for the reaction of **1** with **2**. Reaction conditions: cyclohexenone (**1**) (1.0 mmol), phenylboronic acid (**2**), SiO<sub>2</sub>/diamine/Rh-a (Rh: 6.0 μmol), 1,4-dioxane/H<sub>2</sub>O (10/1, 2.0 mL), 60 °C. Slope (log[rate]/log[PhB(OH)<sub>2</sub>]) = 0.995 ( $r^2 = 0.97$ ).

**$^{13}\text{C}$  CP/MAS NMR of  $\text{SiO}_2/\text{diamine}/\text{Rh}/\text{Me}$**

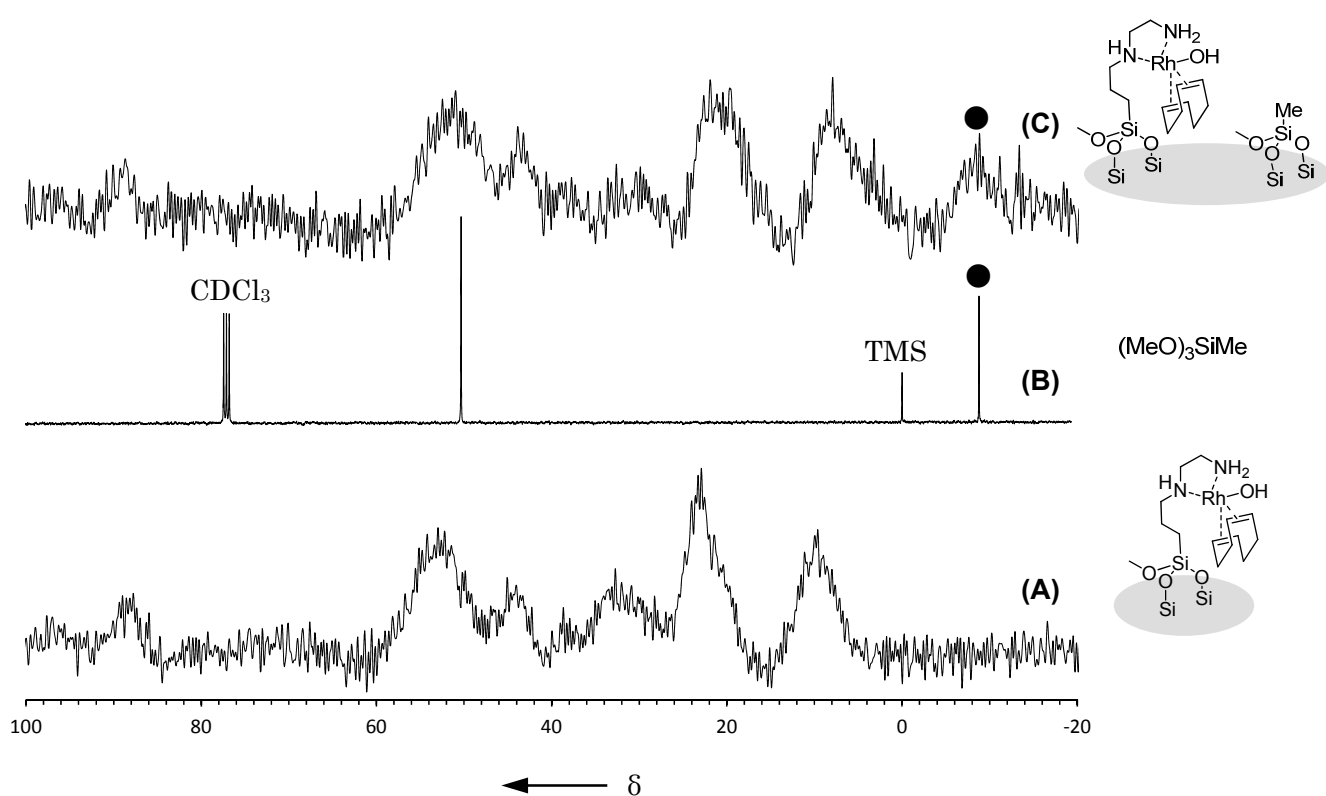

**Figure S10.** (A) Solid-state  $^{13}\text{C}$  CP/MAS NMR spectrum of  $\text{SiO}_2/\text{diamine}/\text{Rh-a}$ , (B) liquid-state  $^{13}\text{C}$  NMR spectrum of trimethoxymethylsilane, and (C) solid-state  $^{13}\text{C}$  CP/MAS NMR spectrum of  $\text{SiO}_2/\text{diamine}/\text{Rh}/\text{Me}$ .



## **<sup>1</sup>H and <sup>13</sup>C NMR spectra of products**

### **Table 7**

The <sup>1</sup>H NMR chemical shifts of the products (Table 7, entries 1–3, 5 and 6) corresponded with the literature values.<sup>[3]</sup> <sup>1</sup>H NMR chemical shift of products (Table 7, entry 4) corresponded with the literature.<sup>[4]</sup>

### **Scheme 9**

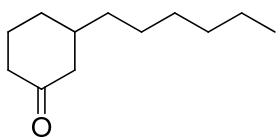

**<sup>1</sup>H NMR** (400 MHz, CDCl<sub>3</sub>) δ 0.86-0.93 (t, 3H), 1.19-1.50 (m, 11H), 1.58-1.71 (m, 1H), 1.71-1.82 (m, 1H), 1.85-1.93 (m, 1H), 1.94-2.12 (m, 2H), 2.19-2.30 (m, 1H), 2.30-2.39 (m, 1H), 2.39-2.51 (m, 1H)

**<sup>13</sup>C NMR** (100 MHz, CDCl<sub>3</sub>) δ 14.3, 22.8, 25.5, 26.8, 29.6, 31.6, 32.0, 36.8, 39.3, 41.7, 48.5, 212.2. These spectra were in agreement with the literature.<sup>[5]</sup>

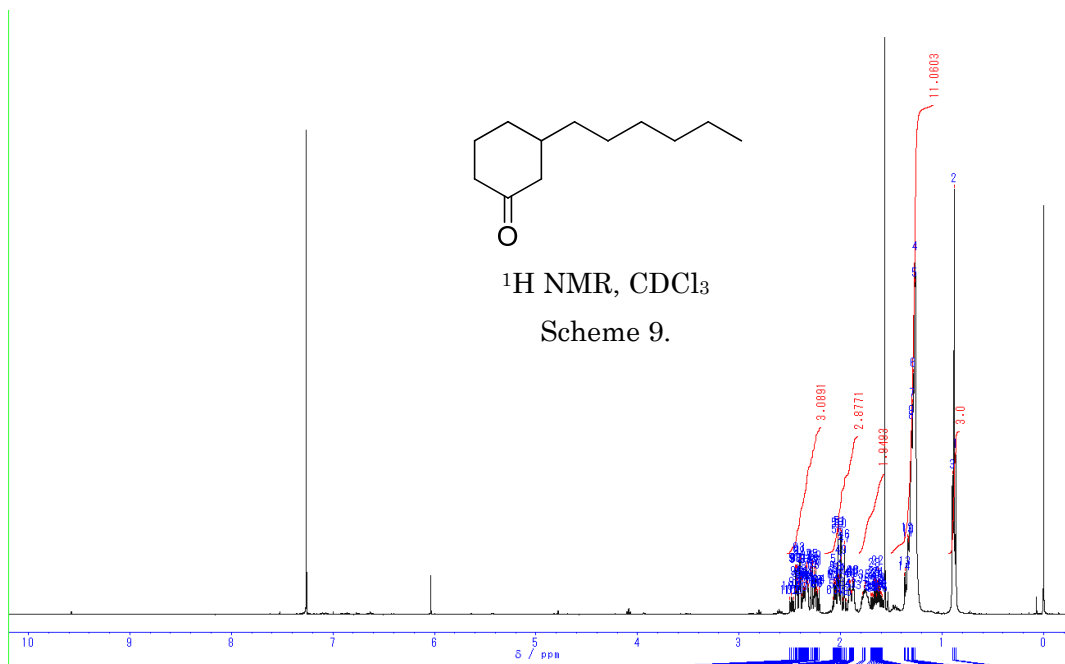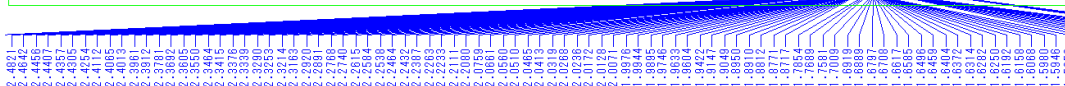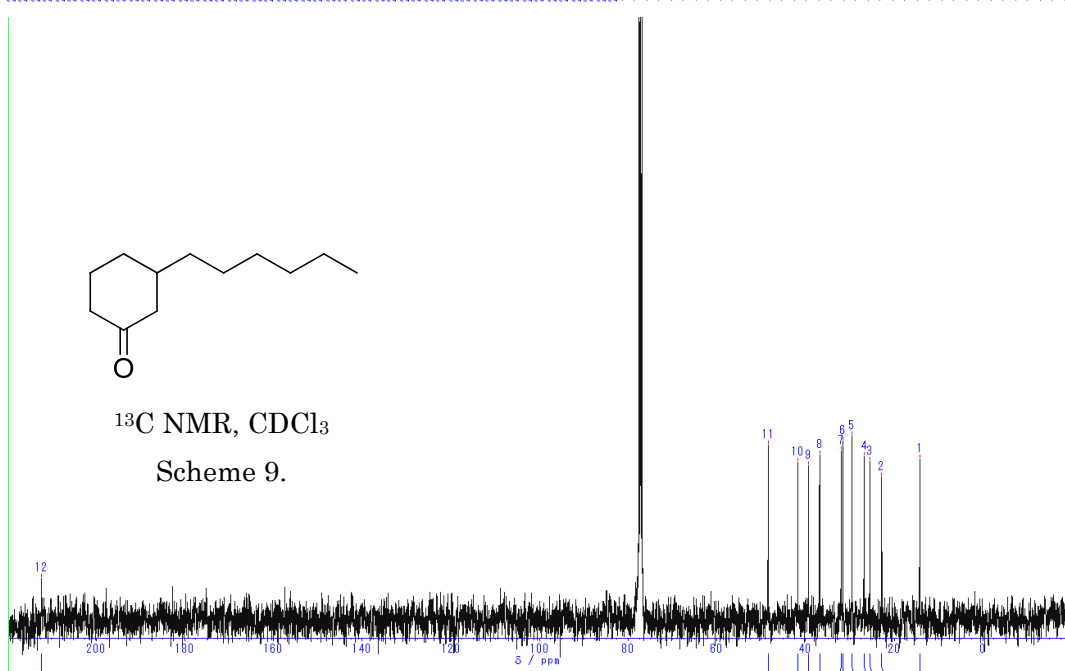

## References

- [1] (a) Ravel, B.; Newville, M. *Synchrotron Rad.* **2005**, *12*, 537. (b) Newville, J. *Synchrotron Rad.* **2001**, *8*, 322.
- [2] (a) Ankudinov, A. L., Ravel, B., Rehr, J. J.; Conradson, S. D. *Phys Rev B* **1998**, *58*, 7565. (b) Rehr, J. J.; Albers, R. C. *Rev. Mod.Phys.* **2000**, *72*, 621. (c) Rehr, J. J.; Albers, R. C.; Zabinsky, S. I. *Phys. Rev. Lett.* **1992**, *69*, 3397.
- [3] Stemmler, R. T.; Bolm, C. *J. Org. Chem.* **2005**, *70*, 9925.
- [4] Iizuka, M.; Kondo, Y. *Eur. J. Org. Chem.* **2008**, *7*, 1161.
- [5] Shen, Z.-L.; Cheong, H.-L.; Loh, T.-P. *Tetrahedron Lett.* **2009**, *50*, 1051.
